# Supplementary material for: Tracking Monocyte Recruitment and Macrophage Accumulation in Atherosclerotic Plaque Progression Using a Novel hCD68GFP/ApoE−/− Reporter Mouse—Brief Report
Source: PubMed Central journal article supplement (PMC5274540; doi:10.1161/atvbaha.116.308367), 2017-01-25
Supplement: NIHMS70472-supplement-Legacy_Supplemental_File.pdf [file NIHMS70472-supplement-Legacy_Supplemental_File.pdf]

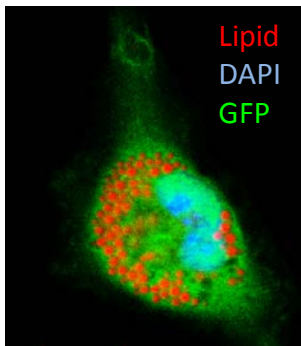

*Ex vivo* Foam Cells

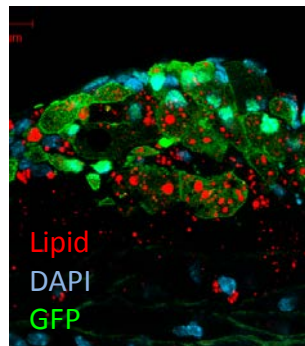

Foam Cells in Plaque

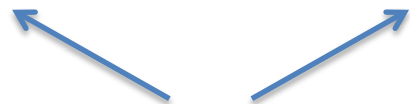

hCD68GFP/ApoE-/-  
GFP<sup>+</sup> Macrophages

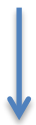

Athero protected

Athero prone

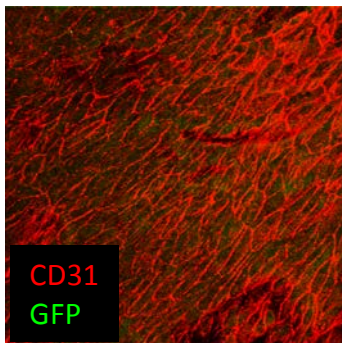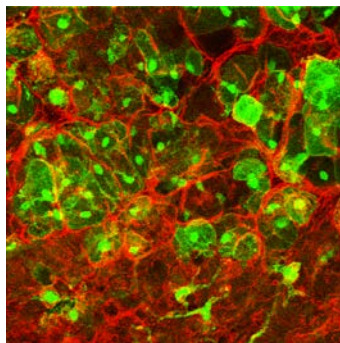

En Face Aortic Arch
